# Supplementary material for: Intratumoral CD56bright natural killer cells are associated with improved survival in bladder cancer
Source: PubMed Central journal article supplement (PMC6284861; doi:10.18632/oncotarget.26362), 2018-11-23
Supplement: oncotarget-09-36492-s001.pdf [file oncotarget-09-36492-s001.pdf]

# Intratatumoral CD56<sup>bright</sup> natural killer cells are associated with improved survival in bladder cancer

## SUPPLEMENTARY MATERIALS

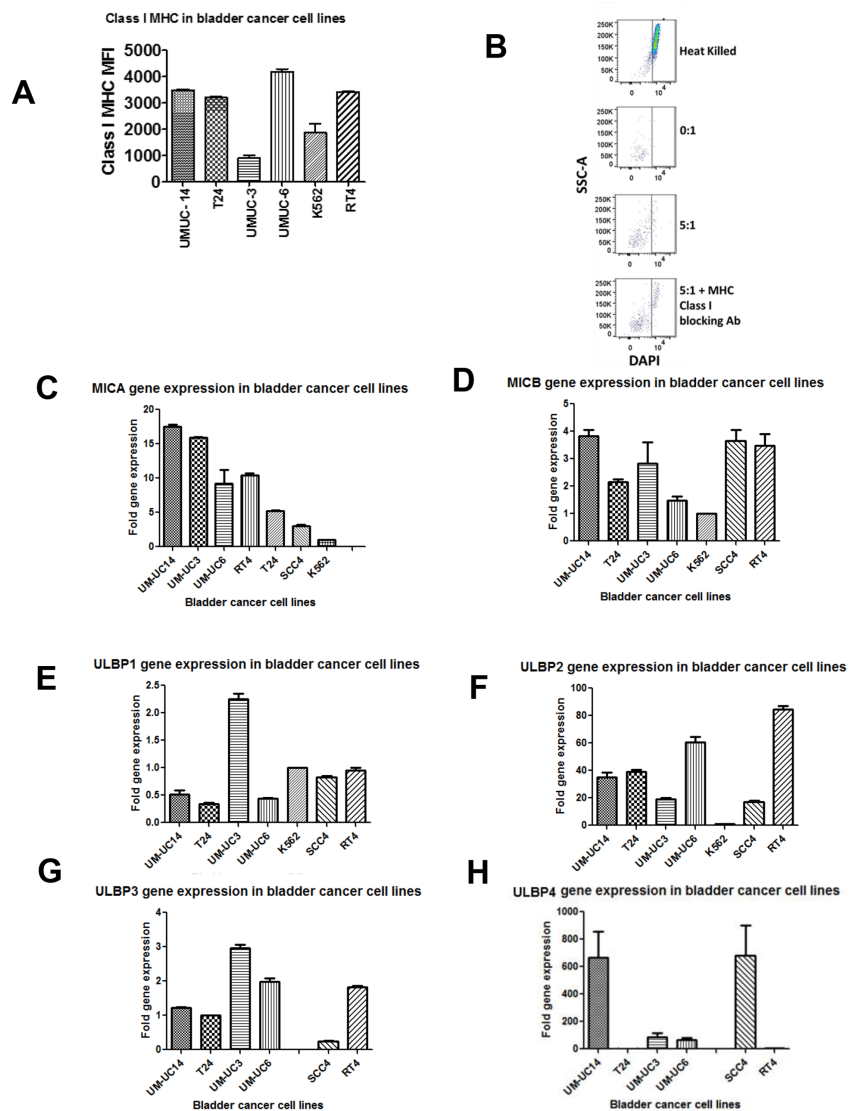

**Supplementary Figure 1: Expression of NK cell ligands on human cancer cells.** (A) Human cancer cell lines (UMUC-14, T24, UMUC-3, UMUC-6, K562, and RT4) were cultured and processed for staining of Class I MHC by flow cytometry. Mean  $\pm$  SEM. (B) Representative flow gating of NK cell cytotoxicity of NK cell cytotoxicity assay. Sorted NK cells from human bladder tumor assayed with CFSE-labeled RT4 bladder cancer target cells. The positive control was heat killed CFSE-labeled target cells and negative control was live CFSE labeled target cells alone. To block, MHC I CFSE labeled target cells were incubated with MHC I blocking antibody. Human cancer cell lines (UMUC-14, T24, UMUC-3, UMUC-6, K562, and RT4) were cultured and RT-PCR is carried out to test the mRNA expression of (C) MHC class I polypeptide-related sequence A (MICA), (D) MHC class I polypeptide-related sequence B (MICB), (E) UL16 binding protein 1 (ULBP1), (F) UL16 binding protein 2 (ULBP2), (G) UL16 binding protein 3 (ULBP3), (H) UL16 binding protein 4 (ULBP4). Mean  $\pm$  SEM.

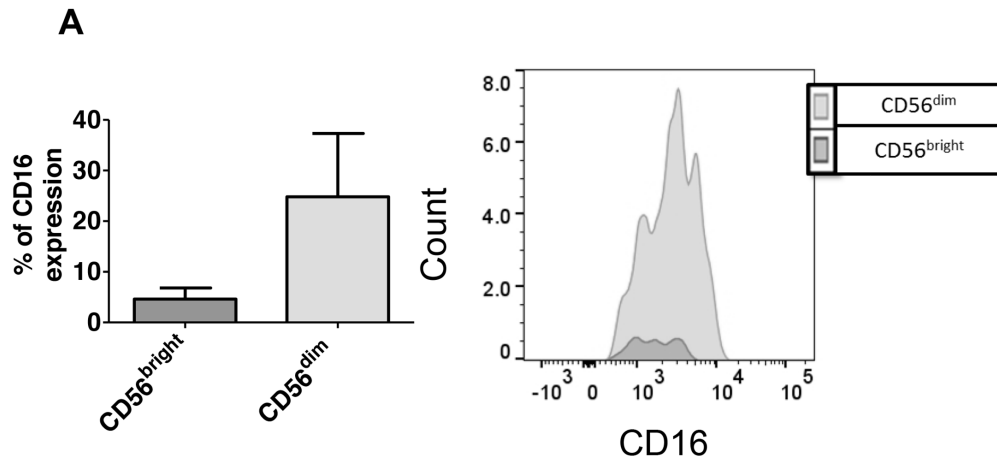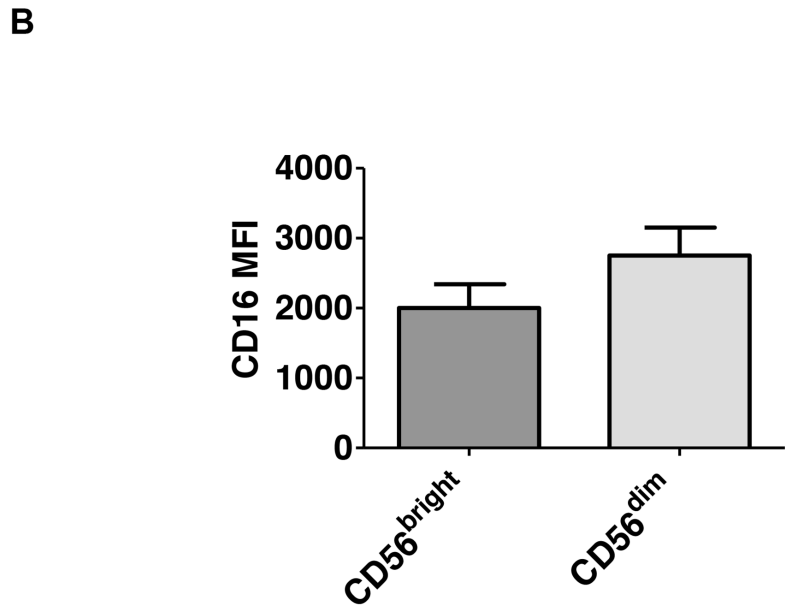

**Supplementary Figure 2: CD16 expression is lower on CD56<sup>bright</sup> compared to CD56<sup>dim</sup> bladder intratumoral NK cells.** Human bladder tumor samples from patients with bladder cancer were processed into single cell suspensions and NK cells were identified as live CD45<sup>+</sup> Lin (CD14, ILT3, CD19)<sup>-</sup>CD3<sup>-</sup>cKIT<sup>+</sup> cells and were further characterized into CD56<sup>bright</sup> and CD56<sup>dim</sup> populations. **(A)** Graph of percent of CD16 on CD56<sup>dim</sup> and CD56<sup>bright</sup> NK cells. **(B)** Density of CD16 surface expression evaluated by mean fluorescence intensity (MFI) were further determined on CD56<sup>dim</sup> and CD56<sup>bright</sup> NK cells populations by flow cytometry.

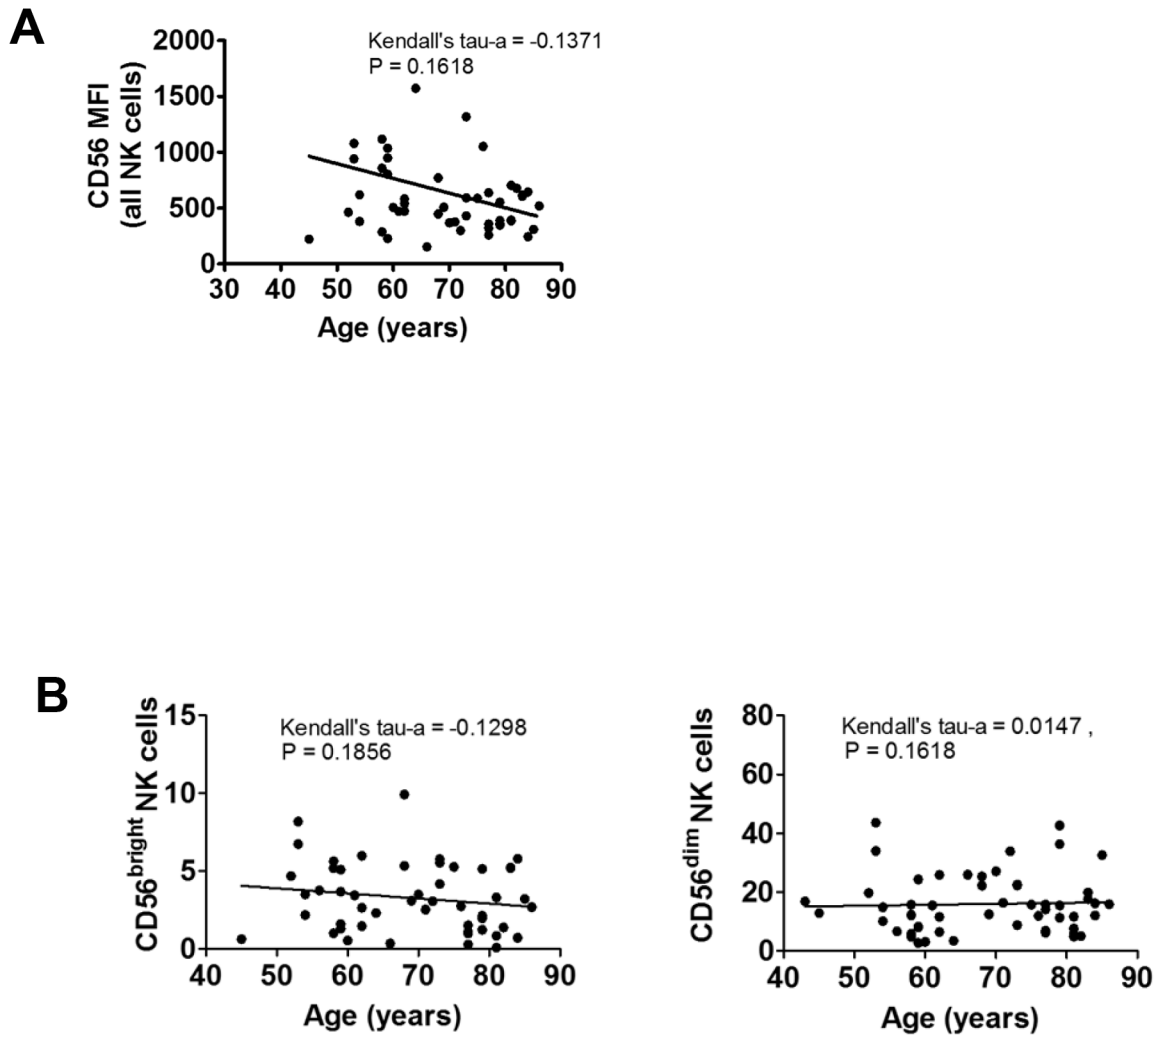

**Supplementary Figure 3: Association of NK cell subsets with aging in local bladder cancer patient cohort.** (A) Bladder tumor samples from patients (n=50) with BC were processed into single cell suspensions and NK cells were identified as live CD45<sup>+</sup> Lin (CD14, ILT3, CD19)<sup>-</sup> CD3<sup>-</sup> cKIT<sup>-</sup> cells. Scatterplot with linear trend line of CD56 mean fluorescence intensity (MFI) on NK cells across patient age is plotted (Kendall's tau-a = -0.1371, P = 0.1618). (B) NK cells were further characterized into CD56<sup>bright</sup> and CD56<sup>dim</sup> subsets and scatterplots with linear trend line of the percentage of these two subsets across patient age are plotted.
